# Supplementary material
Source: ML conference proceedings conference paper supplement (https://openreview.net/forum?id=7GSvrUhayyz)

# Biased Dose Responses from Observational Study

A hidden attribute in the population...

- a) lowers personal thresholds for toxicity
- b) leads people to take smaller dosages on average

The hidden attribute affects a) the response [outcomes], and b) the observed dosage [treatment assignments], so it is a hidden confounder.

**One that dangerously biases the apparent dose response!**

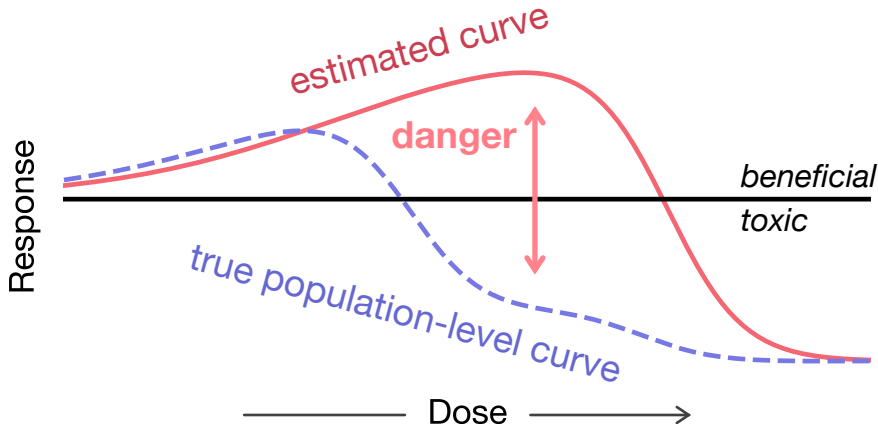

Supplement: supplementary_material [file attachment]
