# Supplementary material
Source: ML conference proceedings conference paper supplement (https://openreview.net/forum?id=7GSvrUhayyz)

## a) Confounded Outcomes for Binary Treatments

$$P[Y_t] = P[Y_t | T = t] \times P[T = t] \\ + \underbrace{P[Y_t | T = 1-t]}_{\text{counterfactual}} \times P[T = 1-t]$$

## b) Confounded Outcomes for Continuous Treatments

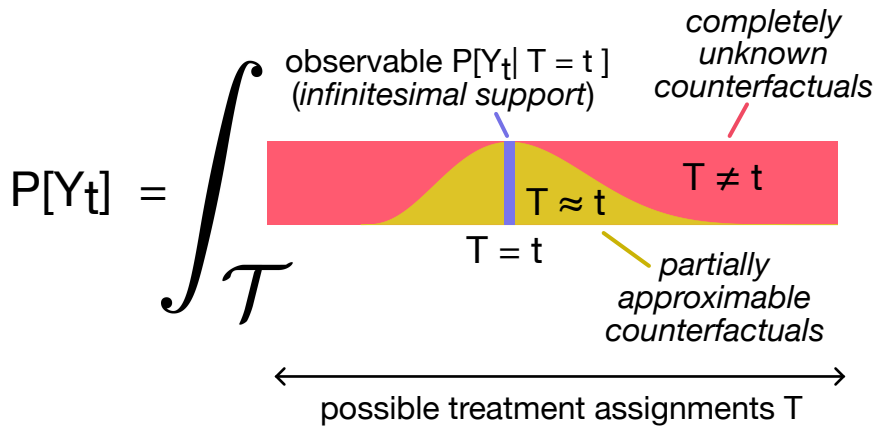

Supplement: supplementary_material [file attachment]
