# Supplementary material
Source: ML conference proceedings conference paper supplement (https://openreview.net/forum?id=7GSvrUhayyz)

# Biased Dose Responses from Observational Study

Personal  
Toxic Dosage

|                      |   |                  |
|----------------------|---|------------------|
| Visible<br>Attribute | 0 | 4 → 2            |
|                      | 1 | 5 → 3            |
|                      |   | 0 1              |
|                      |   | Hidden Attribute |

## The hidden attribute...

- a) lowers average observed dosages from 4 to 2 units (not depicted)
- b) lowers thresholds for toxicity (see grid to the left)

It affects a) the treatment and b) the outcome, so it is a hidden confounder.

## Analysis

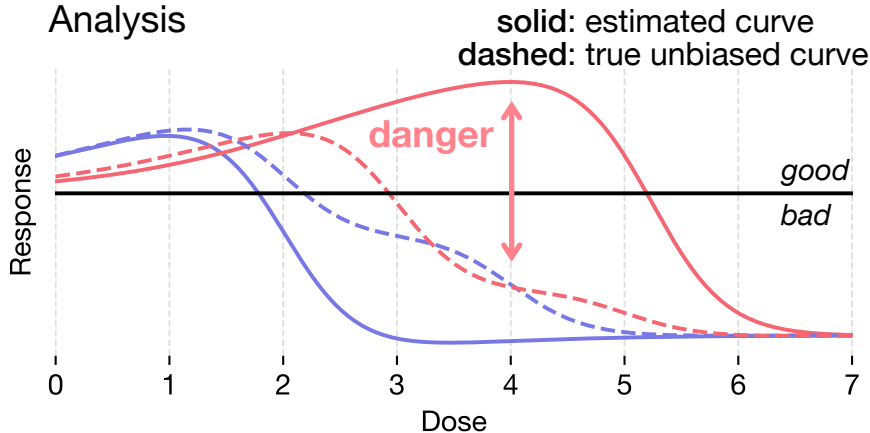

Supplement: supplementary_material [file attachment]
