# Supplementary material
Source: ML conference proceedings conference paper supplement (https://openreview.net/forum?id=7GSvrUhayyz)

**Z**

**X**

**T**

**$Y_t$**

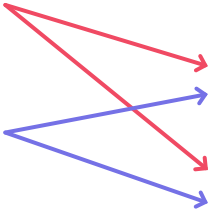

Supplement: supplementary_material [file attachment]

# Dose Responses from An Observational Study

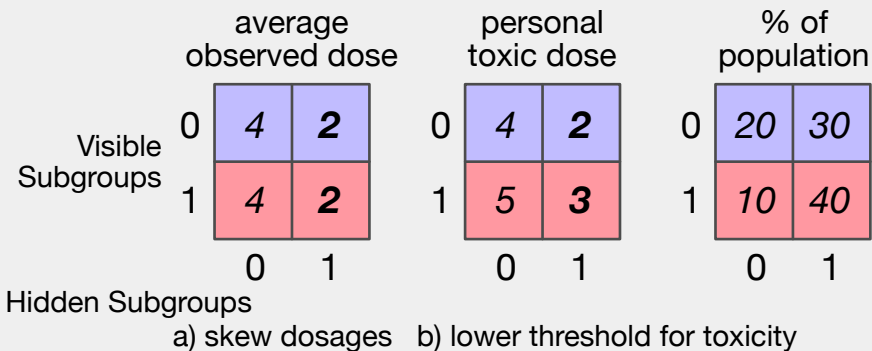

## Results

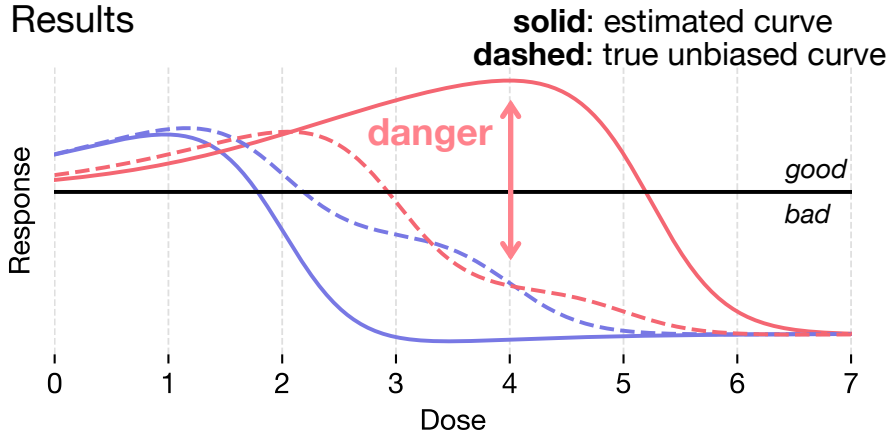

Supplement: supplementary_material [file attachment]

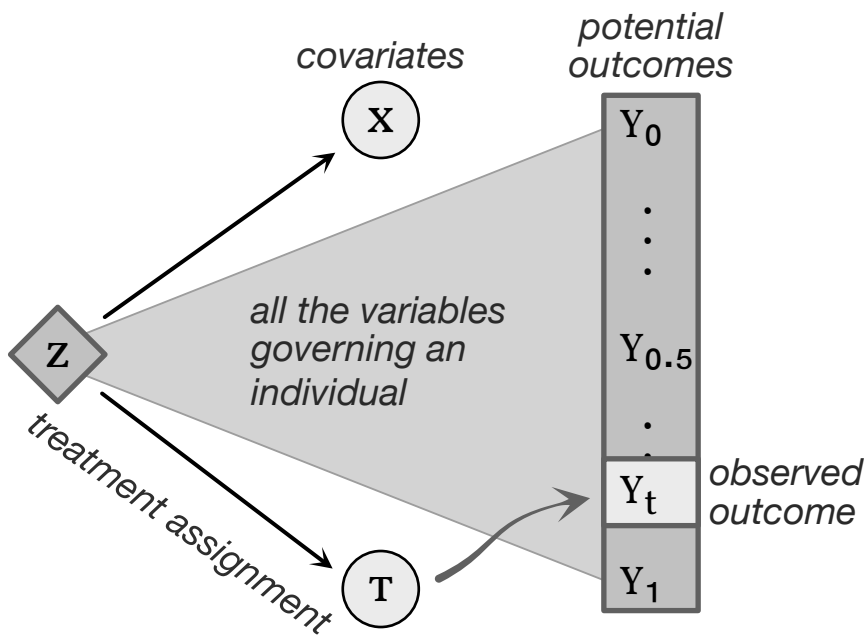

Supplement: supplementary_material [file attachment]

## Causal Sensitivity for Binary Treatments

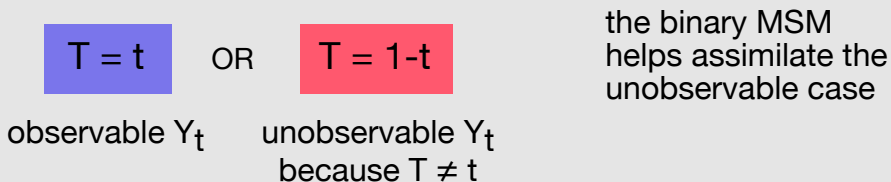

## Causal Sensitivity for Continuous Treatments

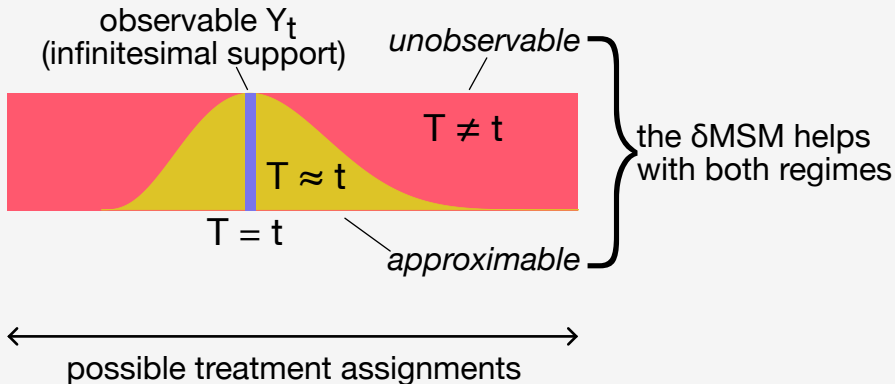

Supplement: supplementary_material [file attachment]
